# Supplementary material for: Efficient functionalization of magnetite nanoparticles with phosphonate using a one-step continuous hydrothermal process
Source: Royal Society of Chemistry journal article supplement (doi:10.1039/c6dt01050d), 2016-01-01
Supplement: c6dt01050d1.pdf [file c6dt01050d1.pdf]

**Electronic Supplementary Information**

**Efficient functionalization of magnetite nanoparticles with phosphonate using a one-step  
continuous hydrothermal process**

G. Thomas,<sup>a</sup> F. Demoisson,<sup>a</sup> J. Boudon<sup>a</sup> and N. Millot<sup>a\*</sup>

<sup>a</sup> *Laboratoire Interdisciplinaire Carnot de Bourgogne UMR 6303 CNRS-Université Bourgogne Franche-Comté, 9 Av. A. Savary,  
BP 47870 F-21078 DIJON Cedex, France.*

\* *Corresponding author: [nmillot@u-bourgogne.fr](mailto:nmillot@u-bourgogne.fr)*

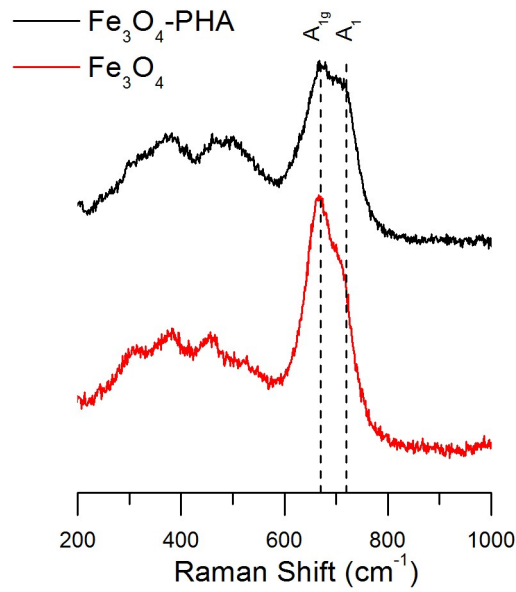

**Fig. S1:** Raman spectra in the range of 200-1000  $\text{cm}^{-1}$  on  $\text{Fe}_3\text{O}_4$  and  $\text{Fe}_3\text{O}_4$ -PHA NPs

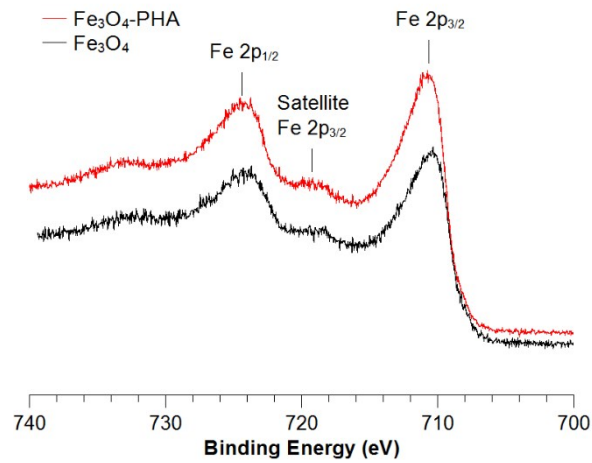

**Fig. S2:** Normalized XPS spectra of Fe2p collected on  $\text{Fe}_3\text{O}_4$  and  $\text{Fe}_3\text{O}_4$ -PHA NPs

**Table S1.** Satellites peaks positions of  $\text{Fe}_3\text{O}_4$  and  $\text{Fe}_3\text{O}_4$ -PHA NPs

|                              | Fe 2p <sub>1/2</sub> (eV) | Satellite Fe 2p <sub>3/2</sub> (eV) | Fe 2p <sub>3/2</sub> (eV) | $\Delta(\text{Satellite} - \text{Fe } 2p_{3/2})$ (eV) |
|------------------------------|---------------------------|-------------------------------------|---------------------------|-------------------------------------------------------|
| $\text{Fe}_3\text{O}_4$      | 724.0                     | 718.6                               | 710.4                     | 8.2                                                   |
| $\text{Fe}_3\text{O}_4$ -PHA | 724.0                     | 718.7                               | 710.5                     | 8.2                                                   |

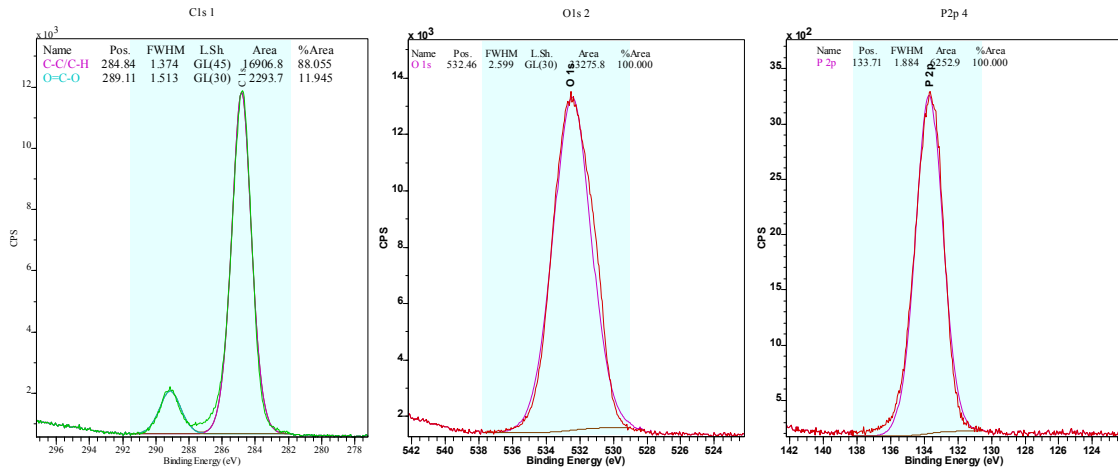

**Fig. S3:** Normalized XPS spectra of C1s, O1s and P2p collected on PHA molecule

### ICP-AES measurements

The sample mass was 10, 07 mg dissolved in a total volume of 10 mL.

The iron and phosphorus contents were determined (after dissolution in HNO<sub>3</sub> and ultrasound treatment) by ICP-AES and led to the following results:

**Table S2.** Mass concentrations of Fe and P determined by ICP

| Iron concentration $Fe_{ICP}$ | Phosphorus concentration $P_{ICP}$ |
|-------------------------------|------------------------------------|
| 57.64 %                       | 1.14 %                             |
| 580.43 mg/mL                  | 11.48 mg/mL                        |

Note that ratio of iron over phosphorus is  $R_{Fe/P} = Fe_{ICP}/P_{ICP} = 57.6\% / 1.14\% = 50.6$

➤ Calculation of PHA molecule number:

$P_{ICP}$  is the phosphorus concentration in our sample, 1 mole of PHA ( $M(PHA) = 6 \times 12.011 + 13 \times 1.0079 + 5 \times 15.9994 + 1 \times 30.973761 = 196.14$  g/mol) contains 1 mole of phosphorus ( $M(P) = 30.973761$  g/mol).

$$\text{Number(PHA)} = \frac{P_{ICP} \times N_A}{M(P)} = 2.23 \times 10^{20} \text{ PHA}$$

With  $P_{ICP}$  the phosphorus concentration  $11.48 \times 10^{-3}$  g (considering 1 L),  $N_A$  the Avogadro number  $6.022 \times 10^{23} \text{ mol}^{-1}$ ,  $M(P)$  the atomic weight of phosphorus  $30.973761 \text{ g} \cdot \text{mol}^{-1}$

➤ Calculation of the  $Fe_{3(1-\delta)}O_4$  ( $\delta = 0.065$ ) surface available for PHA grafting:

$Fe_{ICP}$  is the concentration of iron in our sample made of oxidized magnetite  $Fe_{3(1-\delta)}O_4$  ( $\delta = 0.065$ )  $\leftrightarrow Fe_{2.805}O_4$  ( $M(Fe_{2.805}O_4) = 2.805 \times 55.845 + 4 \times 15.9994 = 220.64$  g/mol) in which there are 2.805

moles of iron. The specific surface area of  $\text{Fe}_{2.805}\text{O}_4$  was determined by BET measurement to be 147  $\text{m}^2/\text{g}$ . As a consequence, the surface developed by our sample is given by the following equation:

$$\text{Surface}(\text{Fe}_{3(1-\delta)}\text{O}_4) = \frac{\text{Fe}_{\text{ICP}} \times M(\text{Fe}_{2.805}\text{O}_4) \times \text{SSA}}{2.805 \times M(\text{Fe}) \times 10^{-18}} = 12.01 \times 10^{19} \text{ nm}^2$$

With  $\text{Fe}_{\text{ICP}}$  the iron concentration  $580.4 \times 10^{-3} \text{ g}$  (considering 1 L),  $M(\text{Fe}_{3(1-\delta)}\text{O}_4)$  the molecular weight of oxidized magnetite 220.64 g/mol, SSA the specific surface area of  $\text{Fe}_{3(1-\delta)}\text{O}_4$  NPs 147  $\text{m}^2 \cdot \text{g}^{-1}$ ,  $M(\text{Fe})$  the atomic weight of iron 55.845 g/mol

➤ Calculation of PHA coverage on oxidized magnetite:

Subsequently of previous calculations, the coverage of PHA molecules on  $\text{Fe}_{3(1-\delta)}\text{O}_4$  corresponds to the ratio of the number of PHA molecules by the available surface of  $\text{Fe}_{3(1-\delta)}\text{O}_4$ .

$$\text{Coverage} = \frac{\text{Number}(\text{PHA})}{\text{Surface}(\text{Fe}_{3(1-\delta)}\text{O}_4)} = 1.86 \text{ PHA/nm}^2$$

➤ In short, the PHA coverage can be calculated as follows:

$$\text{Coverage (PHA/nm}^2) = \frac{2.805 \times P_{\text{ICP}} \times M(\text{Fe}) \times N_A \times 10^{-18}}{\text{Fe}_{\text{ICP}} \times M(\text{P}) \times M(\text{Fe}_{2.805}\text{O}_4) \times \text{SSA}}$$

Finally, assuming spherical-shaped NPs with a diameter of  $\phi_{\text{TEM}} = 7 \text{ nm}$ , one NP surface is  $\pi\phi_{\text{TEM}}^2 = 153.94 \text{ nm}^2$ . Hence  $1.86 \times 153.94 = \mathbf{286 \text{ PHA/NP}}$ . This result is in the same order of magnitude<sup>i</sup> than other stabilized iron oxide nanoparticles and about half the theoretical maximum number of phosphonate groups (the footprint of which is determined to be  $18.5 \text{ \AA}^2$  by Miles *et al.* or  $24 \text{ \AA}^2$  by Daou *et al.*)<sup>ii,iii</sup> which is estimated to be  $153.94 \times 100 / (18.5 \text{ or } 24) = [641-832]$  phosphonate max. on 7-nm NPs.

➤ Calculation of the proportion of each phase:

$\text{Fe}_{\text{ICP}} = 57.64\%$ , so the **proportion of  $\text{Fe}_{2.805}\text{O}_4$**  =  $57.64 / (2.805 \times 55.845 / 220.64) = \mathbf{81.2\%}$  (weight)

$P_{\text{ICP}} = 1.14\%$ , so the **proportion of PHA** =  $1.14 / (30.974 / 196.14) = \mathbf{7.2\%}$  (weight)

And so **remaining compounds** such as physisorbed, chemisorbed water *etc.* represent **11.6%** (weight), in good agreement with TGA results (7.9% of physisorbed and chemisorbed water).

With  $M(\text{Fe}) = 55.845 \text{ g/mol}$ ,  $M(\text{Fe}_{2.805}\text{O}_4) = 220.64 \text{ g/mol}$ ,  $M(\text{P}) = 30.974 \text{ g.mol}^{-1}$  and  $M(\text{PHA}) = 196.14 \text{ g/mol}$ .

<sup>i</sup> Y. Lalatonne, C. Paris, J. M. Serfaty, P. Weinmann, M. Lecouvey and L. Motte, *Chem. Commun.*, **2008**, 2553-2555

<sup>ii</sup> W. C. Miles, P. P. Huffstetler, J. D. Goff, A. Y. Chen, J. S. Riffle and R. M. Davis, *Langmuir*, 2011, **27**, 5456-5463

<sup>iii</sup> T. J. Daou, S. Begin-Colin, J. M. Grenèche, F. Thomas, A. Derory, P. Bernhardt, P. Legaré and G. Pourroy, *Chem. Mater.*, 2007, **19**, 4494-4505
